# Supplementary material
Source: PubMed Central journal article supplement (PMC3422705)
Supplement: supp_mol.112.079293_Suppl_fig_2time_course.pdf [file supp_mol.112.079293_Suppl_fig_2time_course.pdf]

## Cardiotonic steroids stabilize RGS2 protein levels

B. Sjögren, S. Parra, L. J. Heath, K. B. Atkins, Z-J. Xie, R. R. Neubig

### Supplemental Figure 2

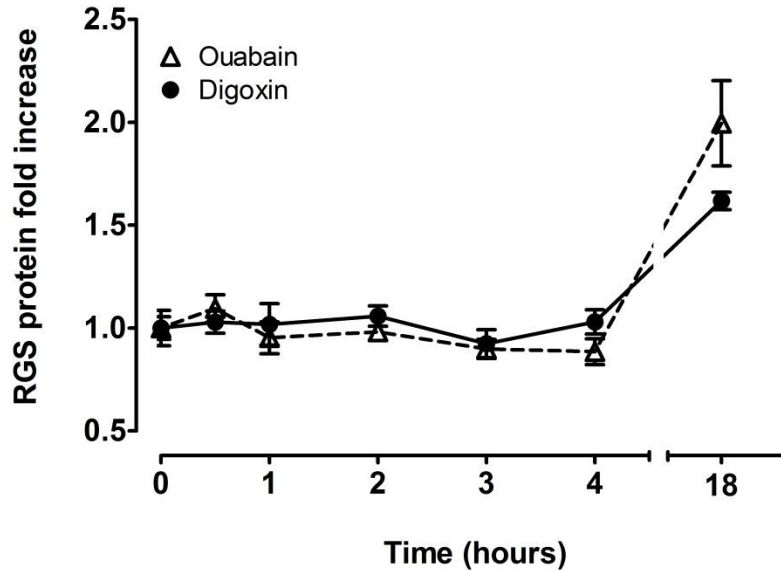

**Supplemental figure 1. Time-dependent increase of RGS2 protein expression by ouabain and digoxin.** HEK-293 cells stably transfected with RGS2-PL were analyzed using the PathHunter™ ProLabel assay. 100nM ouabain or digoxin was added at indicated time points. Only overnight (18h) treatment with these CTS results in increased RGS2 protein levels. Results from two experiments run in quadruplicates.
