# Supplementary material
Source: PubMed Central journal article supplement (PMC3422705)
Supplement: supp_mol.112.079293_Suppl_fig_3_inhibitors.pdf [file supp_mol.112.079293_Suppl_fig_3_inhibitors.pdf]

**Cardiotonic steroids stabilize RGS2 protein levels**

B. Sjögren, S. Parra, L. J. Heath, K. B. Atkins, Z-J. Xie, R. R. Neubig

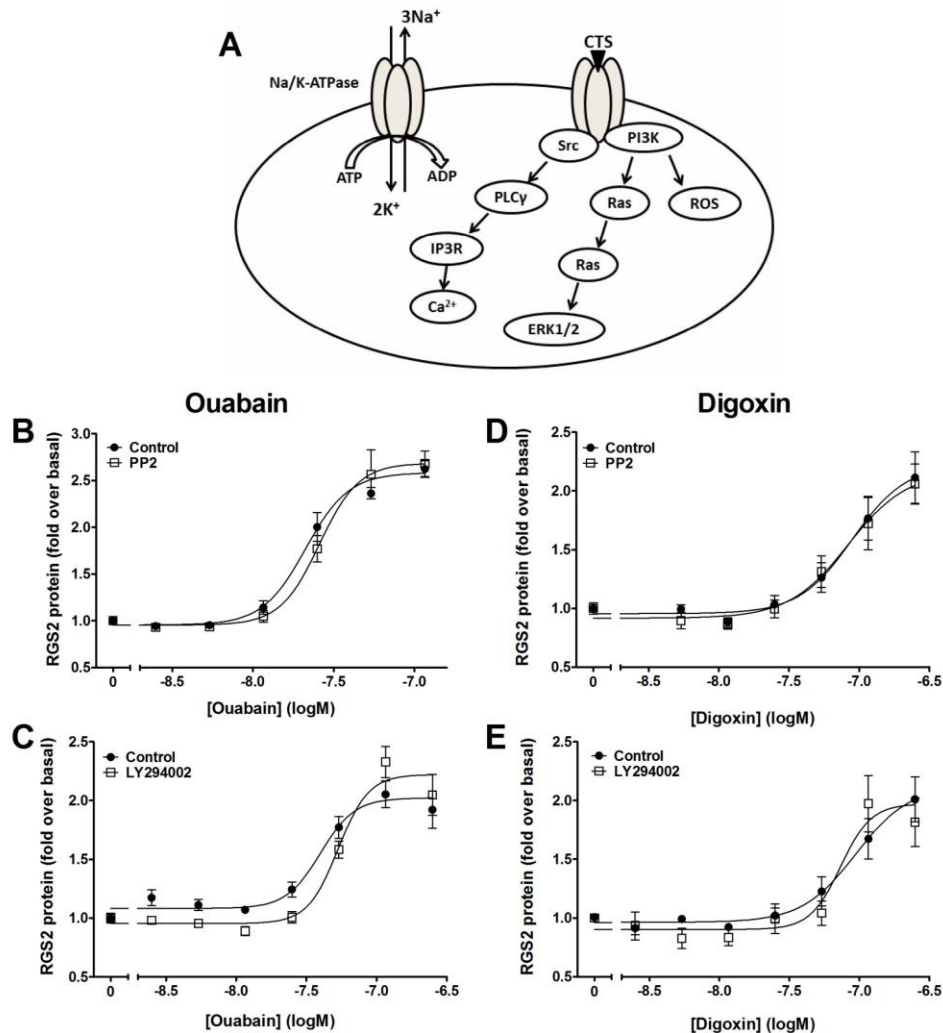

**Supplemental figure 3. Ouabain and digoxin do not increase RGS2 protein levels through actions of Src or PI-3-kinase.**

**A.** Schematic of cellular events mediated through the Na/K-ATPase. CTS are known to inhibit pump function as well as initiating signal transduction cascades mediated through Src and PI-3-kinase (Adapted from Liu J and Xie ZJ, 2010; *Biochim Biophys Acta* **1802**(12):1237-1245). **B-E.** HEK-293 cells stably transfected with RGS2-PL or RGS4-PL were analyzed using the PathHunter<sup>TM</sup> ProLabel assay. Cells were pre-treated for 1h with the Src inhibitor PP2 (3 $\mu$ M; **B, D**) or the PI-3-kinase inhibitor LY294002 (10 $\mu$ M; **C, E**) followed by overnight treatment with increasing concentrations of ouabain (**B, C**) or digoxin (**D, E**). Neither inhibitor had any effect on CTS-induced RGS2 protein level increase. Each graph represents an average of three experiments run in triplicate.
