# Supplementary material
Source: PubMed Central journal article supplement (PMC3422705)
Supplement: supp_mol.112.079293_Supplemental_figure_1.pdf [file supp_mol.112.079293_Supplemental_figure_1.pdf]

**Cardiotonic steroids stabilize RGS2 protein levels**

B. Sjögren, S. Parra, L. J. Heath, K. B. Atkins, Z-J. Xie, R. R. Neubig

**Supplemental Figure 1**

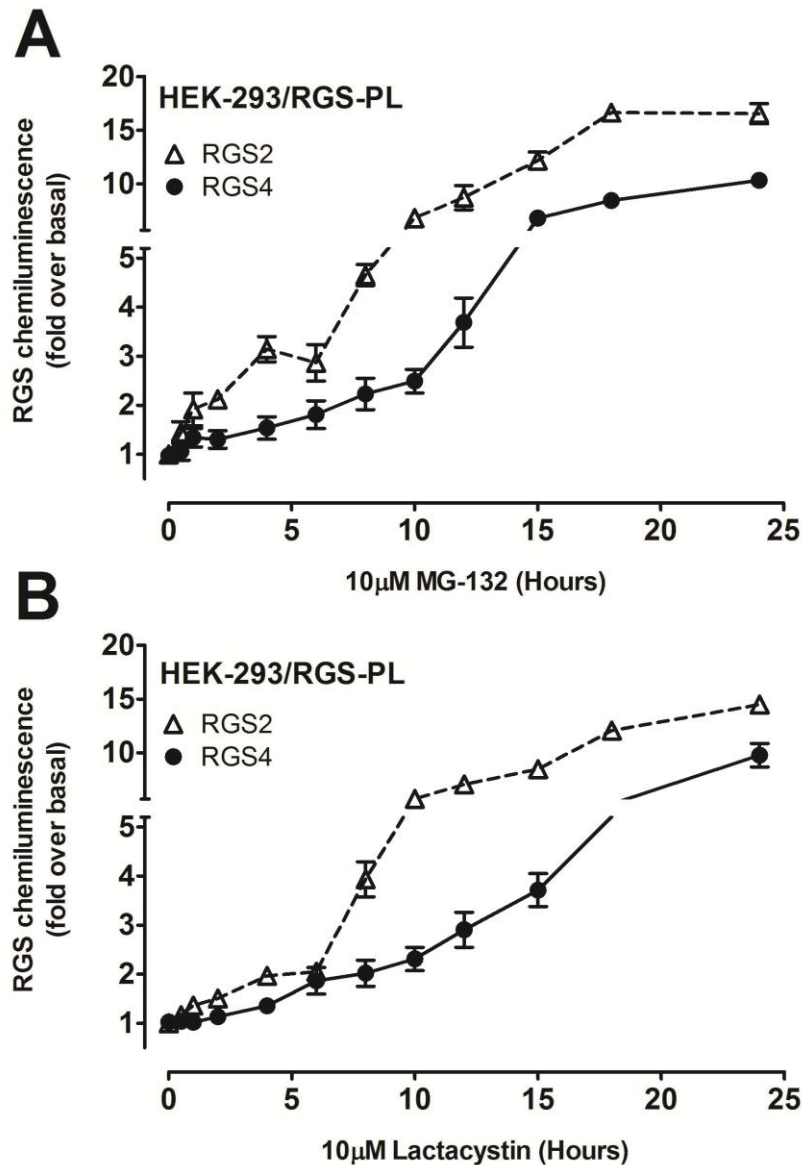

**Supplemental figure 1. Time-dependent increase of RGS2 and RGS4 protein expression by proteasome inhibitors.** HEK-293 cells stably transfected with RGS2-PL or RGS4-PL were analyzed using the PathHunter™ ProLabel assay. 10µM MG-132 or Lactacystin was added at indicated time points. Both proteasome inhibitors increase both RGS2 and RGS4 protein chemiluminescence in a time-dependent manner. The difference in magnitude between the two proteins could be due to the fact that single clones were used. Results from two experiments run in quadruplicates.
