# Supplementary material
Source: PubMed Central journal article supplement (PMC3422705)
Supplement: supp_mol.112.079293_Supplemental_Table_1.pdf [file supp_mol.112.079293_Supplemental_Table_1.pdf]

**Cardiotonic steroids stabilize RGS2 protein levels**

*B. Sjögren, S. Parra, L. J. Heath, K. B. Atkins, Z-J. Xie, R. R. Neubig*

**Supplemental Table 1.** Summary of hits from high-throughput screen of the Microsource Spectrum 2000 and the Biofocus NCC (NIH collection of FDA approved drugs) for compounds that increase RGS2 protein expression. The hits from the RGS2 screen can be divided into categories based on their previously known pharmacology. Note that digoxin was not a primary hit but was chosen for follow-up based on similarity to other CTS and that the majority of hits have not been confirmed in follow-up studies.

| <b>NAME</b>               | <b>Viability<br/>(% of control)</b> | <b>RGS2 increase<br/>(% above control)</b> | <b>DRUG CLASS/USES</b>                            |
|---------------------------|-------------------------------------|--------------------------------------------|---------------------------------------------------|
| Gitoxin                   | 103.1                               | 81.9                                       | Cardiotonic<br>steroids                           |
| Sarmentogenin             | 95.1                                | 59.4                                       |                                                   |
| Ouabain                   | 90.1                                | 51.1                                       |                                                   |
| Gitoxigenin               | 90.1                                | 40.4                                       |                                                   |
| Lanatoside C              | 92.3                                | 26.5                                       |                                                   |
| Vinblastine               | 90.6                                | 83.3                                       | Chemotherapy                                      |
| Mercaptopurine            | 98.2                                | 59.7                                       |                                                   |
| 5-Azacytidine; Vidaza     | 80.2                                | 48.2                                       |                                                   |
| Retusoquinone             | 79.4                                | 38.1                                       |                                                   |
| Camptothecin              | 107.5                               | 29.9                                       |                                                   |
| Teniposide                | 97.2                                | 26.8                                       |                                                   |
| Mesna                     | 93.3                                | 22.8                                       |                                                   |
| Crinamine                 | 109.5                               | 40.8                                       | HIV-1<br>Protease<br>inhibitors                   |
| Nelfinavir Mesylate       | 87.3                                | 28.5                                       |                                                   |
| Indinavir Sulphate        | 101.2                               | 28.3                                       |                                                   |
| 3-Hydroxyflavone          | 77.0                                | 26.1                                       | Flavonoids                                        |
| Acacetin Diacetate        | 76.6                                | 25.7                                       |                                                   |
| Mundulone                 | 95.6                                | 25.1                                       |                                                   |
| Deguelin                  | 104.9                               | 24.0                                       |                                                   |
| Megestrol                 | 89.5                                | 29.3                                       | Synthetic Steroid hormones                        |
| Ethinyl Estradiol         | 111.1                               | 24.8                                       |                                                   |
| Metaproterenol            | 95.2                                | 24.7                                       | Corticosteroids<br>Asthma/Allergy                 |
| Fluticasone<br>Propionate | 93.7                                | 21.4                                       |                                                   |
| Flumethazone<br>Pivalate  | 102.5                               | 20.3                                       |                                                   |
| Tacrolimus                | 98.7                                | 30.4                                       |                                                   |
| Thimerosal                | 68.3                                | 47.2                                       | Antiseptic agent                                  |
| Monesin A                 | 69.1                                | 31.3                                       | Antibiotic                                        |
| Mexamine                  | 89.2                                | 24.8                                       | Serotonin derivative                              |
| Nisoldipine               | 87.0                                | 24.1                                       | Hypertension;<br>Ca <sup>2+</sup> channel blocker |
| Dichlorophene             | 92.4                                | 23.7                                       | Antimicrobial agent                               |
| Hydroxychloroquine        | 92.6                                | 22.5                                       | Malaria                                           |
| Flufenamic Acid           | 90.8                                | 21.3                                       | NSAID                                             |
